# Supplementary material
Source: Research Square preprint supplement (doi:10.21203/rs.3.rs-8082869/v1)
Supplement: Supplementary file 1 [file 9ff0f1e16aeeeaa5a8d795d8.docx]

**Electronic Supplementary Information**

| 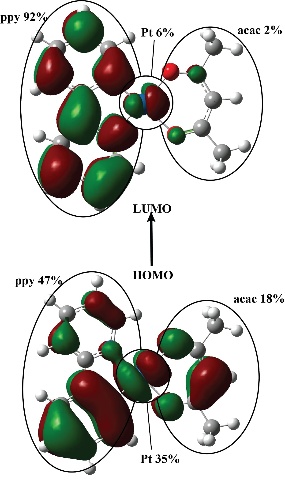  Pt(acc) | 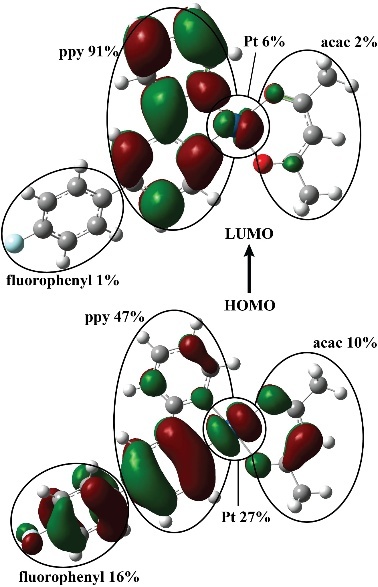  PtM1 |
| --- | --- |
| 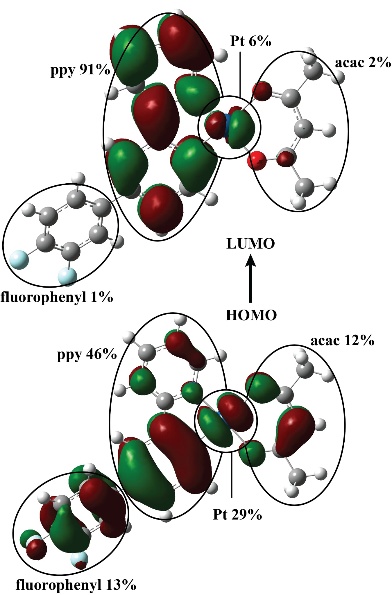  PtM2 | 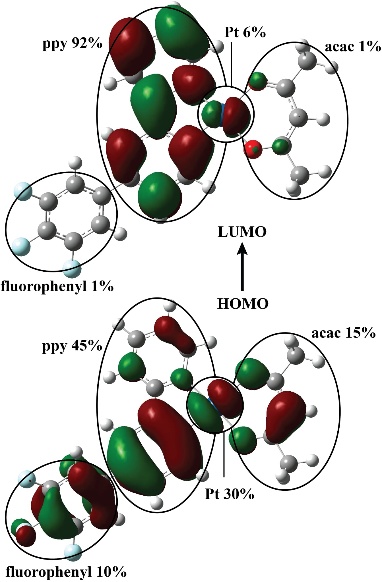  PtM3 |
| **Figure 1S.** (a) Molecular orbital and energetic levels of HOMO and LUMO (eV) and (b) electron distributions of PtM1, PtM2, and PtM3 complexes in singlet excited states | |

| 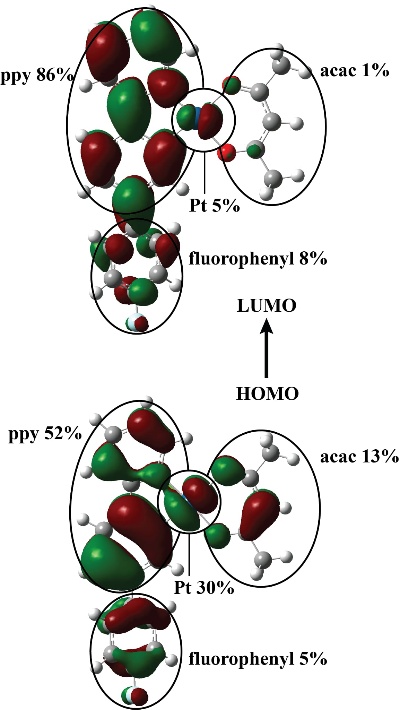  PtP1 | 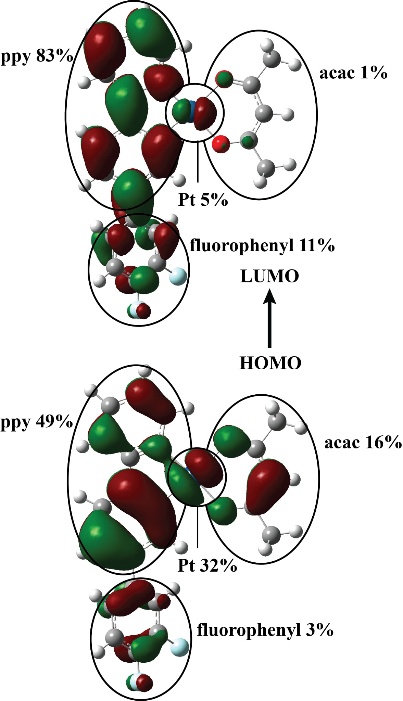  PtP2 |
| --- | --- |
| 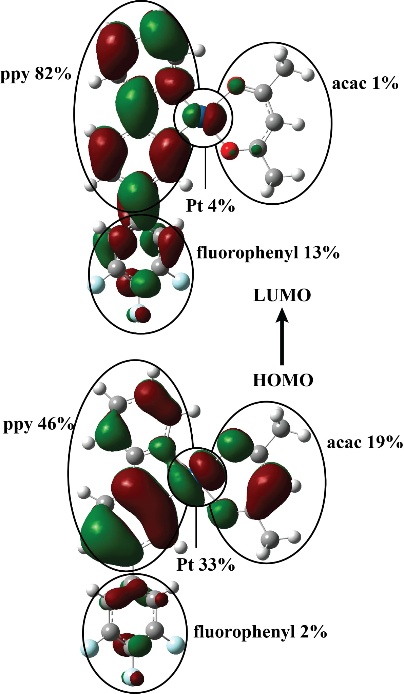  PtP3 | |
| **Figure 2S.** (a) Molecular orbital and energetic levels of HOMO and LUMO (eV) and (b) electron distributions of PtP1, PtP2, and PtP3 complexes in singlet excited states | |

| 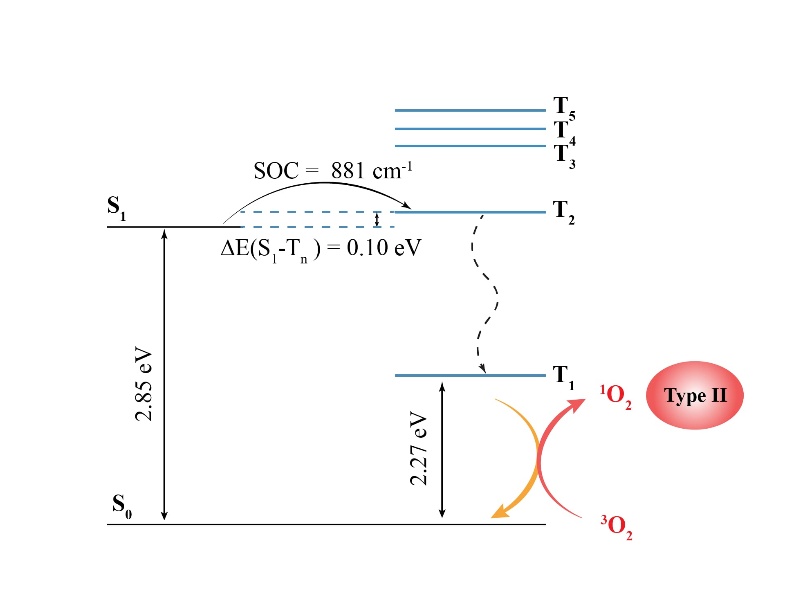  PtM1 |
| --- |
| 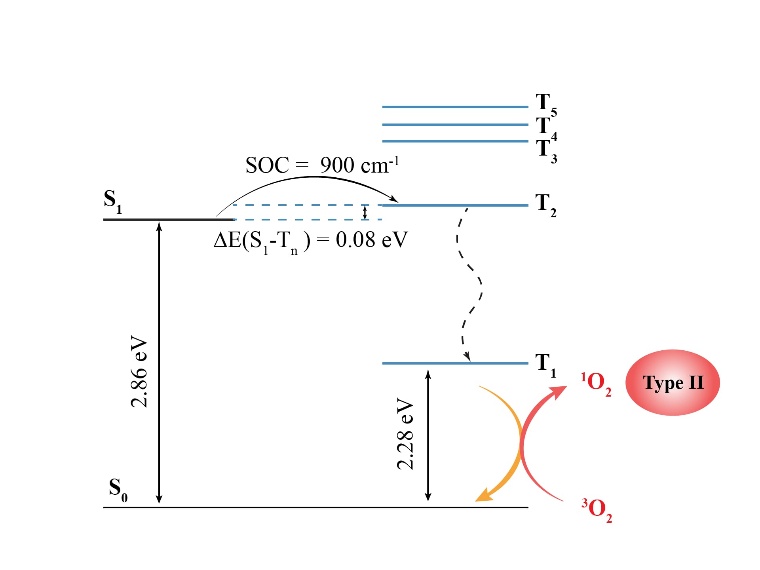  PtM2  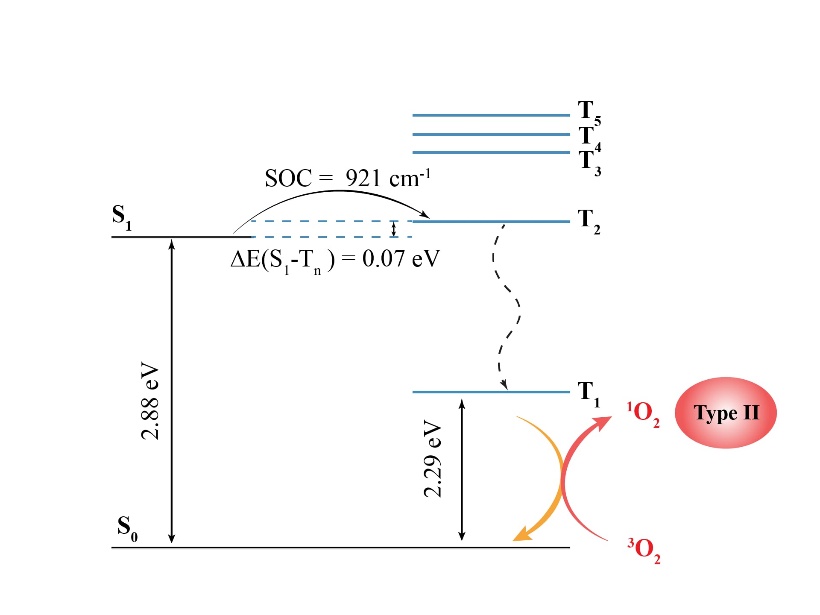  PtM3 |
| **Figure 3S.** Calculated energy diagram and spin-orbit coupling (SOC) matrix elements of PtM1, PtM2, and PtM3 complexes. |

| 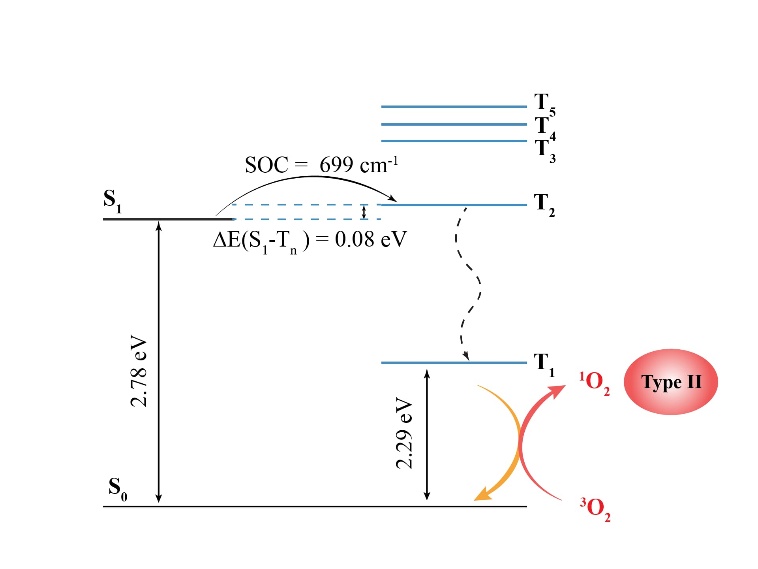  PtP1 |
| --- |
| 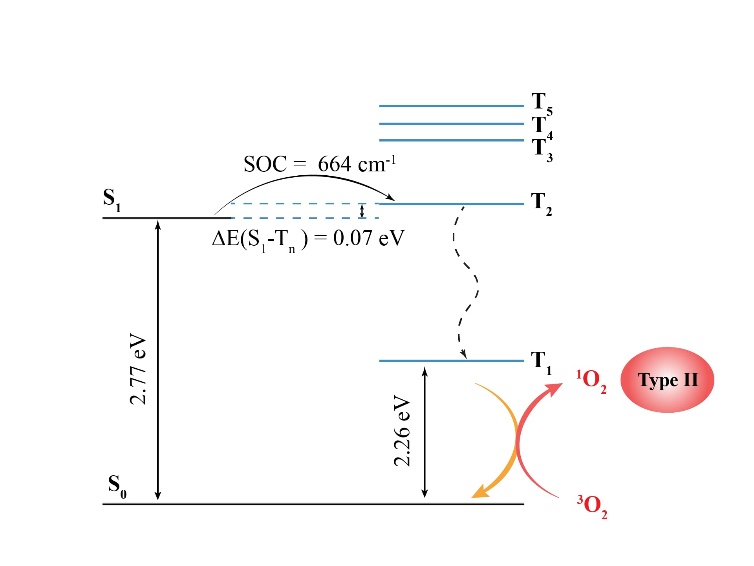  PtP2  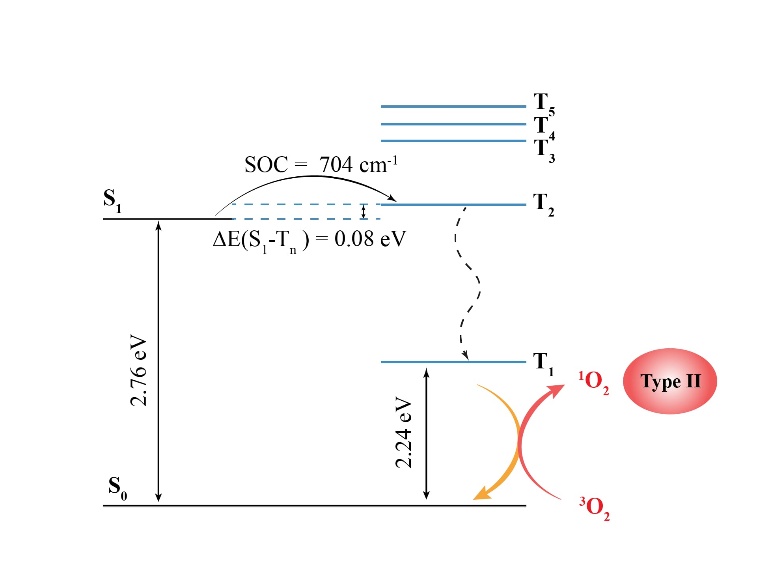  PtP3 |
| **Figure 4S.** Calculated energy diagram and spin-orbit coupling (SOC) matrix elements of PtP1, PtP2, and PtP3 complexes. |
